# Supplementary material
Source: PubMed Central journal article supplement (PMC5664213)

a

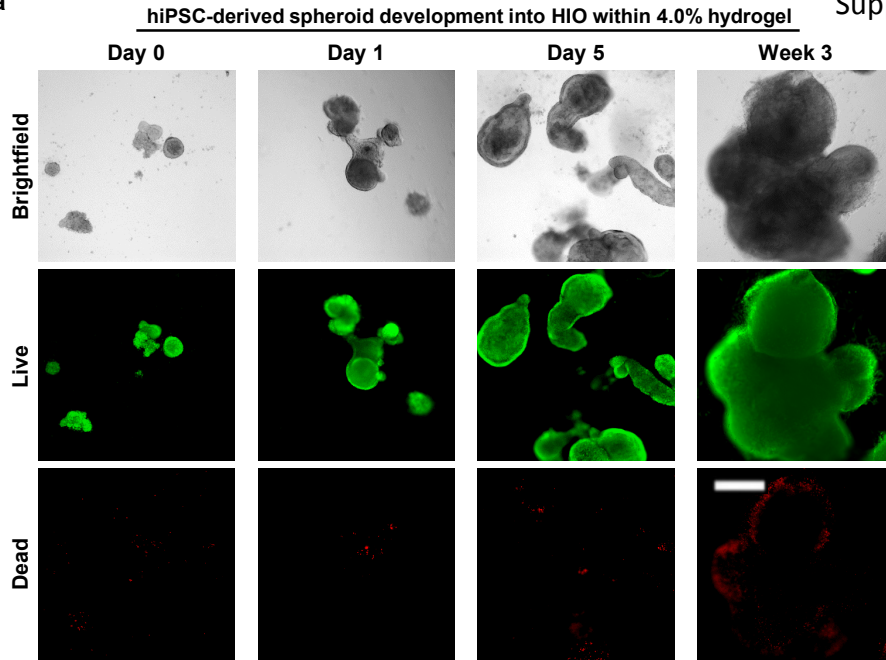

b

**hiPSC-derived spheroid development into HIO within Matrigel**

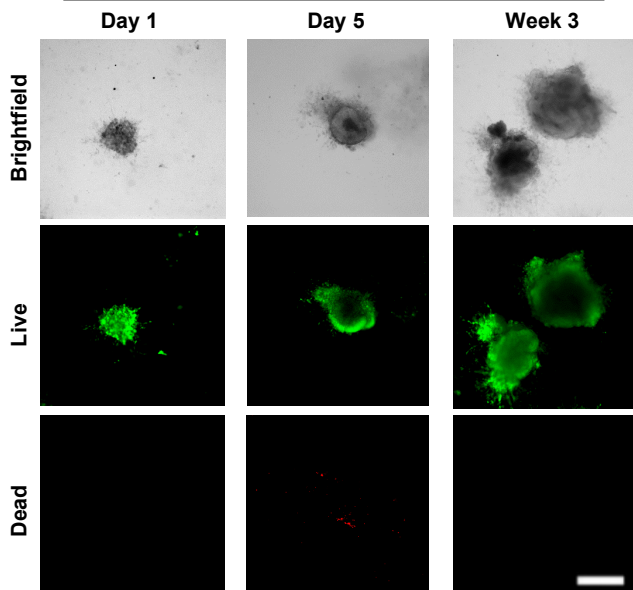

c

**hiPSC-derived spheroid within 8.0% hydrogel**

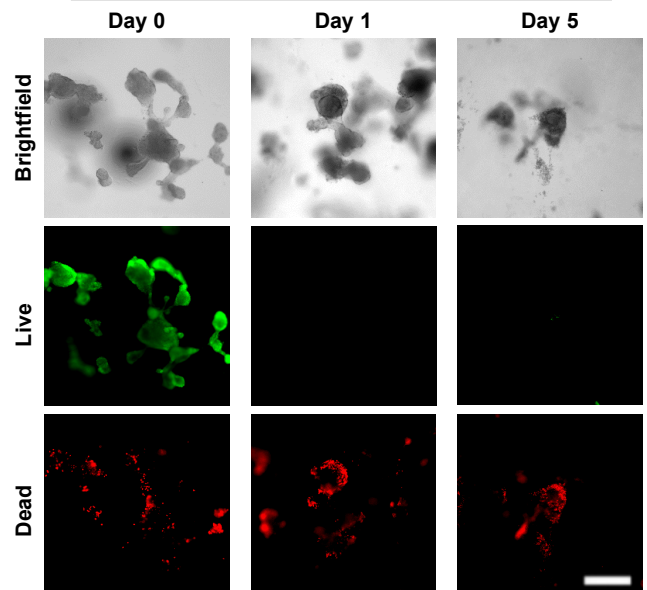

d

**hESC-derived spheroid development into HIO within 4.0% hydrogel**

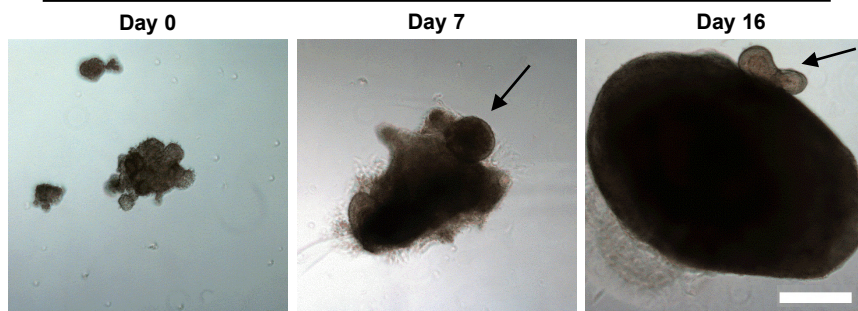

Supplement: NIHMS907408-supplement-3.pdf [file NIHMS907408-supplement-3.pdf]
