# Supplementary material
Source: PubMed Central journal article supplement (PMC5664213)

a

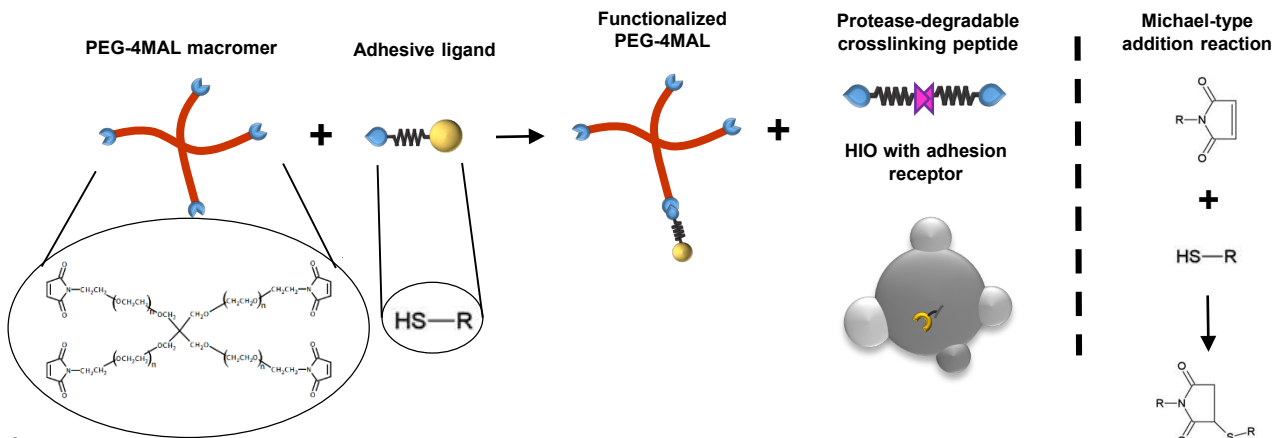

b

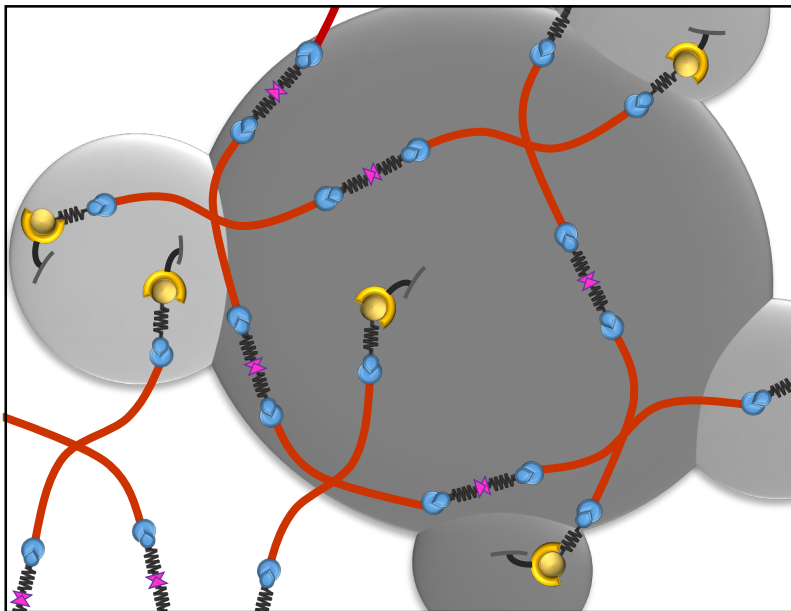

c

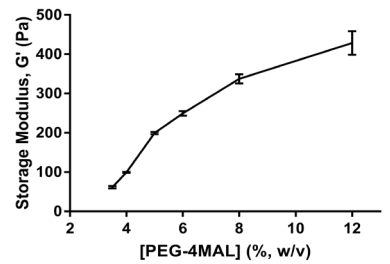

d

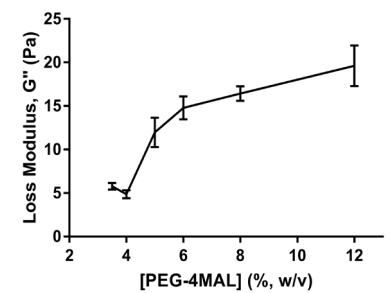

e

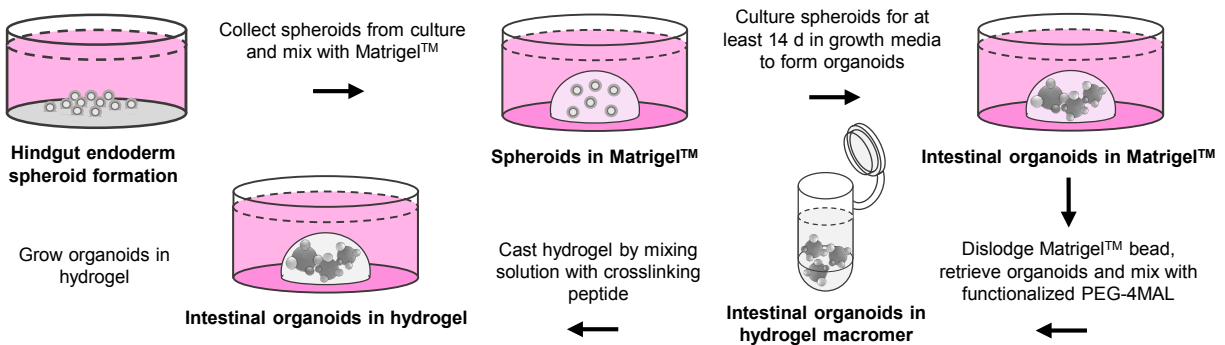

f

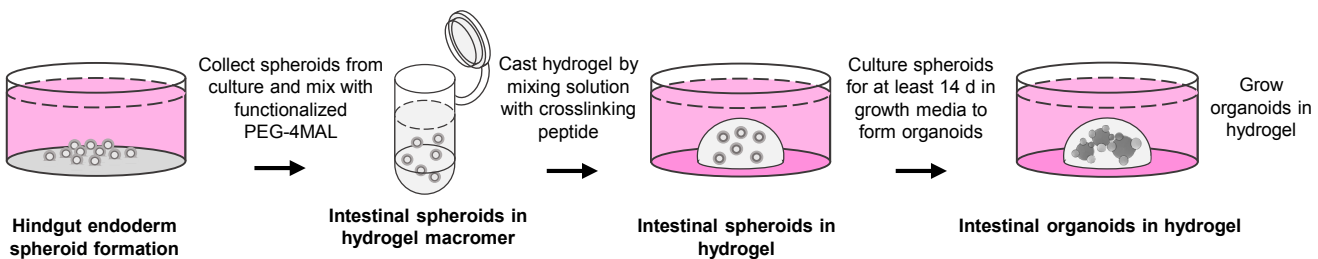

Supplement: NIHMS907408-supplement-2.pdf [file NIHMS907408-supplement-2.pdf]

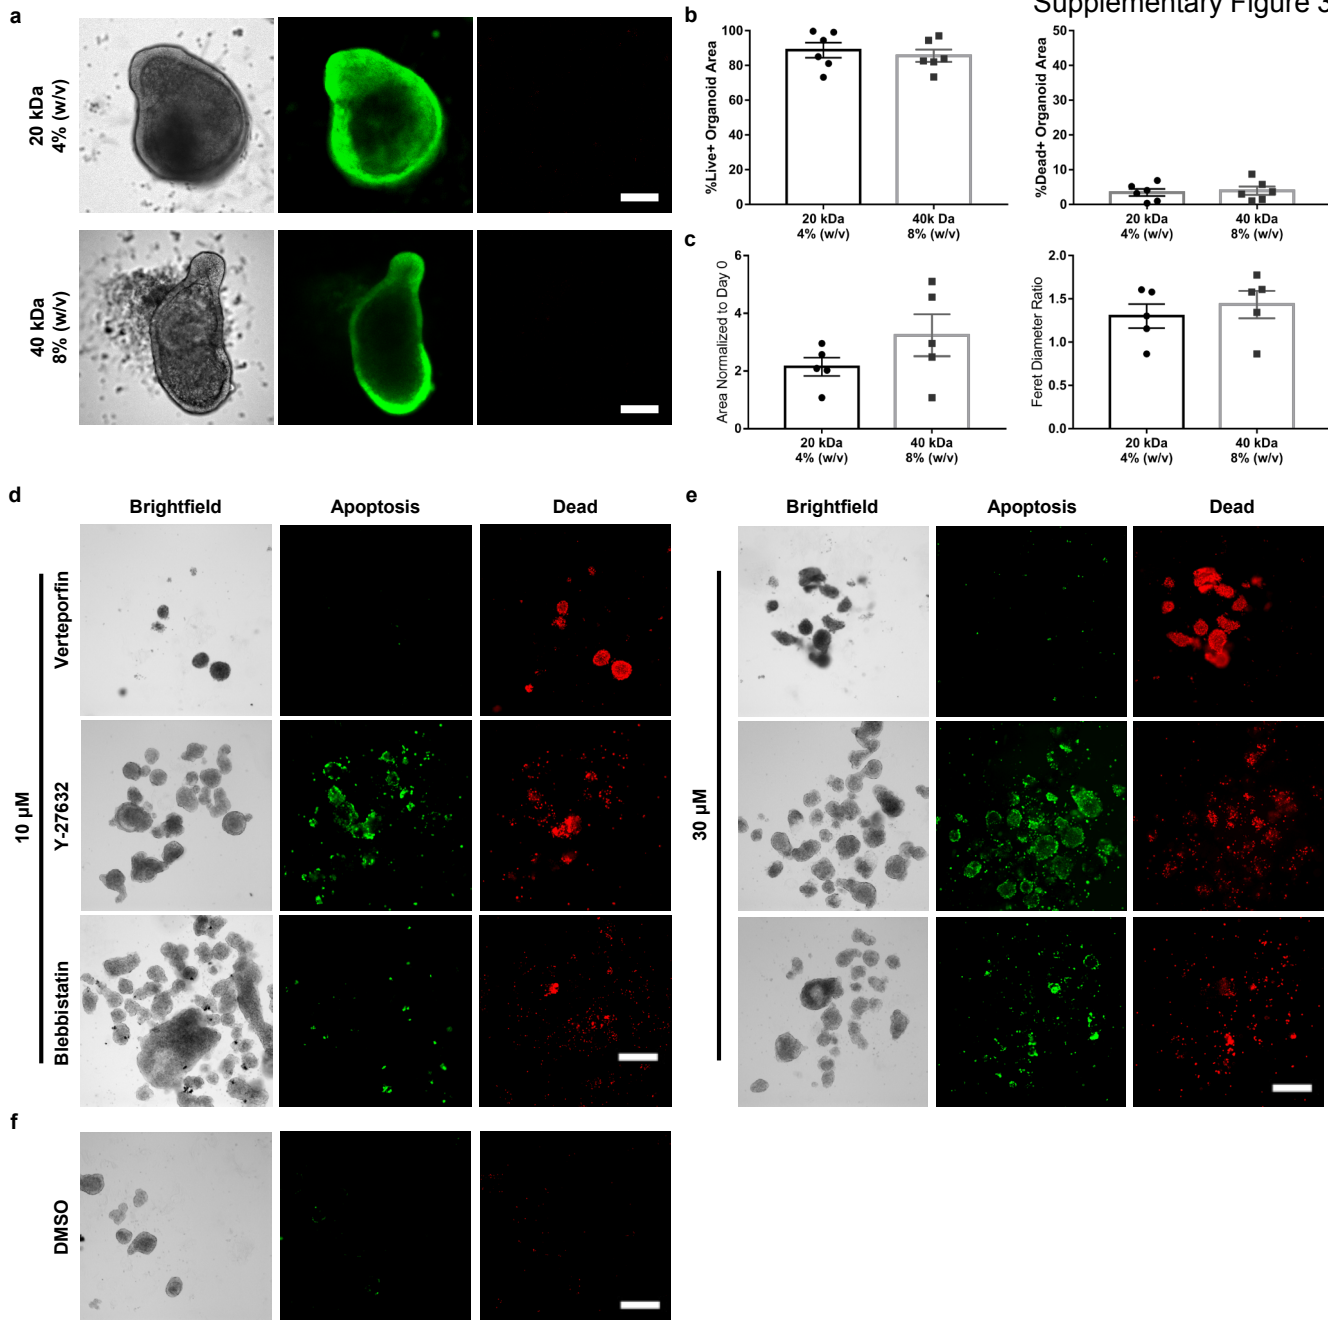

Supplement: NIHMS907408-supplement-4.pdf [file NIHMS907408-supplement-4.pdf]

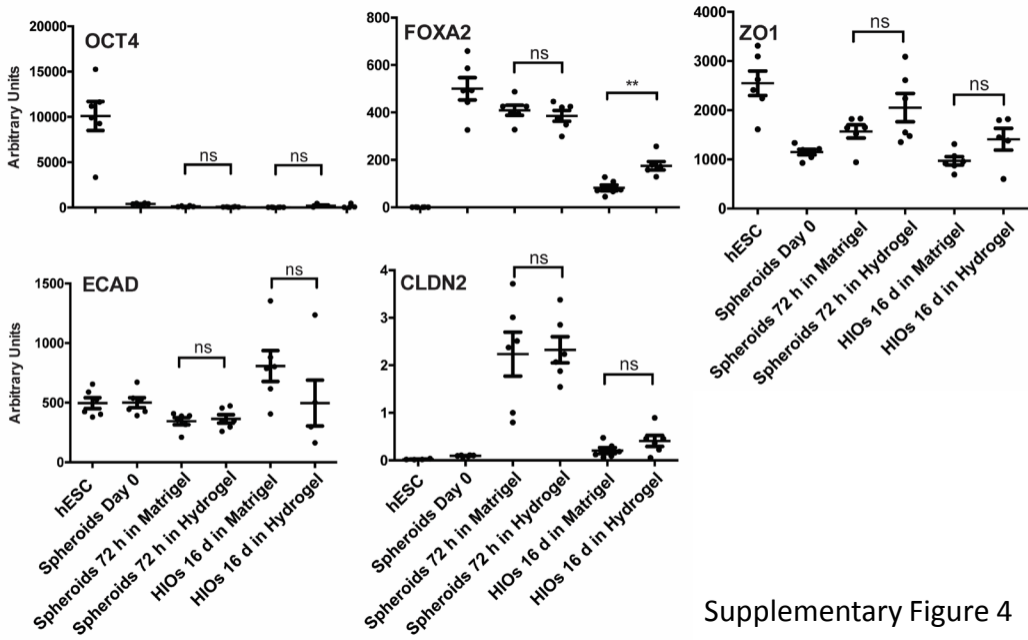

Supplementary Figure 4

Supplement: NIHMS907408-supplement-5.pdf [file NIHMS907408-supplement-5.pdf]

a

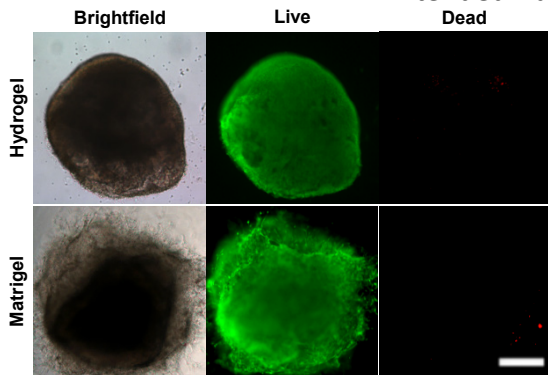

b

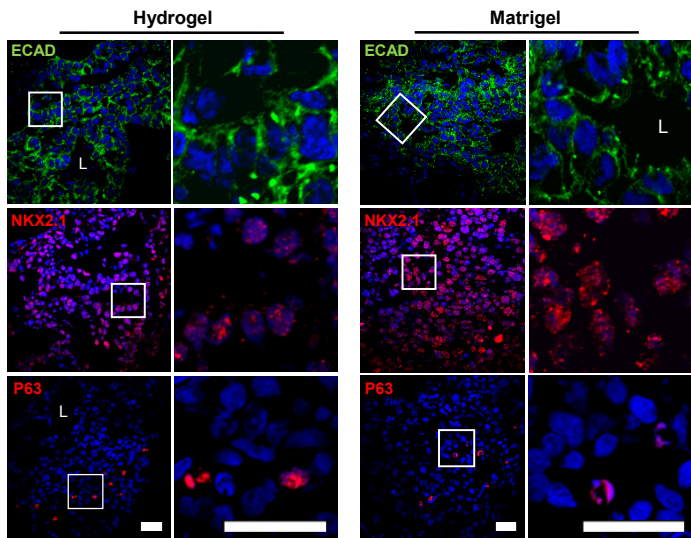

Supplement: NIHMS907408-supplement-6.pdf [file NIHMS907408-supplement-6.pdf]

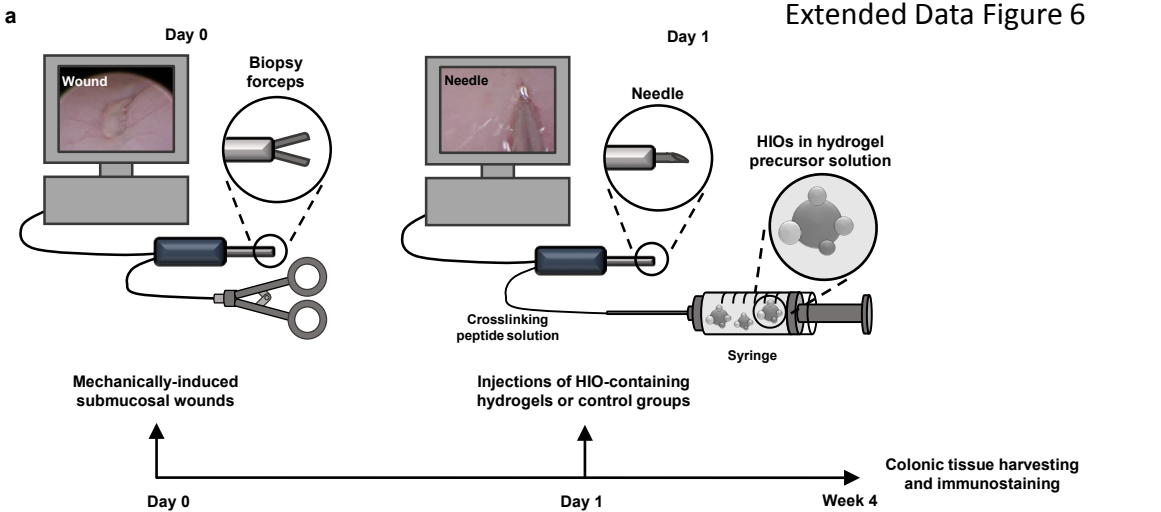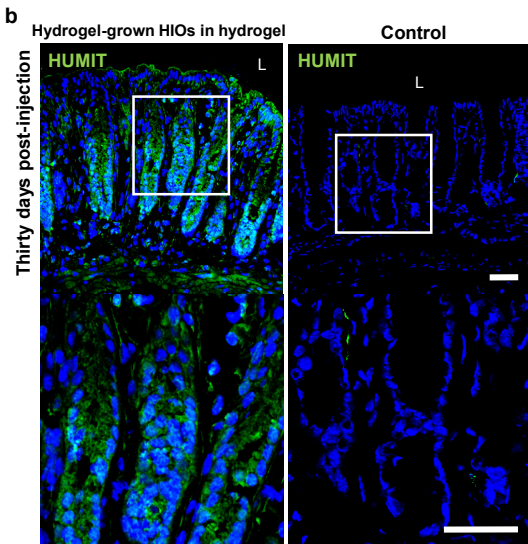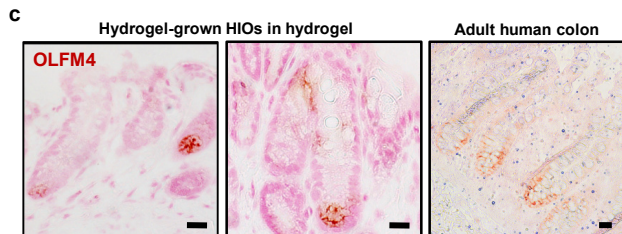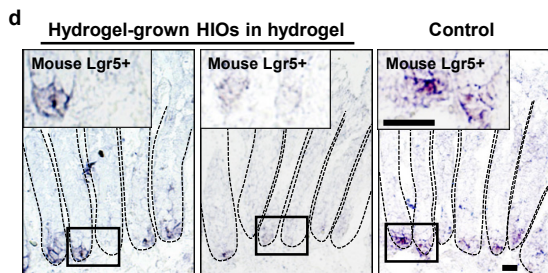

Supplement: NIHMS907408-supplement-7.pdf [file NIHMS907408-supplement-7.pdf]
